# Supplementary material for: A series of [NaMnIII3MnII] clusters constructed using a multidentate Schiff-base ligand and decorated with different auxiliary ligands
Source: Royal Society of Chemistry journal article supplement (doi:10.1039/c3nj00742a), 2013-11-11
Supplement: c3nj00742a.pdf [file c3nj00742a.pdf]

## SUPPORTING INFORMATION

### **A Series of $[\text{NaMn}^{\text{III}}_3\text{Mn}^{\text{II}}]$ Clusters Constructed by Multidentate Schiff-Base Ligand and Decorated by Different Auxiliary Ligands**

Linlin Cong, Xiaoting Qin, Wei Sun, Yanqin Wang, Shuai Ding, Zhiliang Liu\*

#### **List of contents:**

Table S1: Bond Valence Sum Calculations for Compounds 1, 2, 3 and 4.

Table S2: Selected Distances and Bond Angles for Cluster 1.

Table S3: Selected Distances and Bond Angles for Cluster 2.

Table S4: Selected Distances and Bond Angles for Cluster 3.

Table S5: Selected Distances and Bond Angles for Cluster 4.

**Table S1. Bond Valence Sum Calculations for Compounds 1, 2, 3 and 4**

| Compounds                                                                                                                                                                                                                                                           | Mn  | BVS     |
|---------------------------------------------------------------------------------------------------------------------------------------------------------------------------------------------------------------------------------------------------------------------|-----|---------|
| [NaMn <sup>III</sup> <sub>3</sub> Mn <sup>II</sup> (HL) <sub>3</sub> (μ <sub>4</sub> -O)(μ <sub>1,1</sub> -N <sub>3</sub> ) <sub>3</sub> ]<br>ClO <sub>4</sub> ·CH <sub>3</sub> CH <sub>2</sub> OH·(H <sub>2</sub> O) <sub>3</sub> ( <b>1</b> )                     | Mn1 | 3.31535 |
|                                                                                                                                                                                                                                                                     | Mn2 | 3.30965 |
|                                                                                                                                                                                                                                                                     | Mn3 | 3.29588 |
|                                                                                                                                                                                                                                                                     | Mn4 | 2.07624 |
| [NaMn <sup>III</sup> <sub>3</sub> Mn <sup>II</sup> (HL) <sub>3</sub> (μ <sub>4</sub> -O)(μ <sub>1,1</sub> -N <sub>3</sub> ) <sub>2</sub> (μ <sub>1,3</sub> -N <sub>3</sub> )]<br>ClO <sub>4</sub> ·CH <sub>3</sub> CH <sub>2</sub> OH·H <sub>2</sub> O ( <b>2</b> ) | Mn1 | 3.32426 |
|                                                                                                                                                                                                                                                                     | Mn2 | 3.33513 |
|                                                                                                                                                                                                                                                                     | Mn3 | 3.26671 |
|                                                                                                                                                                                                                                                                     | Mn4 | 2.05795 |
| [NaMn <sup>III</sup> <sub>3</sub> Mn <sup>II</sup> (HL) <sub>3</sub> (μ <sub>4</sub> -O)(HCOO) <sub>3</sub> ] ClO <sub>4</sub> ·4H <sub>2</sub> O<br>( <b>3</b> )                                                                                                   | Mn1 | 3.4238  |
|                                                                                                                                                                                                                                                                     | Mn2 | 3.42369 |
|                                                                                                                                                                                                                                                                     | Mn3 | 3.4099  |
|                                                                                                                                                                                                                                                                     | Mn4 | 2.11774 |
| [NaMn <sup>III</sup> <sub>3</sub> Mn <sup>II</sup> (HL) <sub>3</sub> (μ <sub>4</sub> -O)(PhCOO)(H <sub>2</sub> O) <sub>2</sub> ]<br>(ClO <sub>4</sub> ) <sub>2</sub> ·H <sub>2</sub> O·PhCOO·PhCOOH·CH <sub>3</sub> OH ( <b>4</b> )                                 | Mn1 | 3.10961 |
|                                                                                                                                                                                                                                                                     | Mn2 | 3.4323  |
|                                                                                                                                                                                                                                                                     | Mn3 | 3.52907 |
|                                                                                                                                                                                                                                                                     | Mn4 | 2.07104 |

**Table S2. Selected Distances and Bond Angles for Cluster 1**

| Cluster       |          | 1         |           |
|---------------|----------|-----------|-----------|
| Distances [Å] |          |           |           |
| Mn1-N1        | 1.987(7) | Mn3-O11   | 1.880(5)  |
| Mn1-N4        | 2.414(7) | Mn3-O13   | 1.872(5)  |
| Mn1-N7        | 2.391(6) | Mn4-O3    | 2.136(6)  |
| Mn1-O2        | 1.885(6) | Mn4-O4    | 2.271(13) |
| Mn1-O3        | 1.872(6) | Mn4-O7    | 2.137(6)  |
| Mn1-O13       | 1.884(5) | Mn4-O8    | 2.222(7)  |
| Mn2-N2        | 1.980(7) | Mn4-O11   | 2.136(5)  |
| Mn2-N7        | 2.351(6) | Mn4-O12   | 2.234(10) |
| Mn2-N10       | 2.374(6) | Na1-O1    | 2.538(6)  |
| Mn2-O6        | 1.892(6) | Na1-O2    | 2.390(6)  |
| Mn2-O7        | 1.901(6) | Na1-O5    | 2.451(6)  |
| Mn2-O13       | 1.878(5) | Na1-O6    | 2.419(6)  |
| Mn3-N3        | 1.973(6) | Na1-O9    | 2.466(6)  |
| Mn3-N4        | 2.426(7) | Na1-O10   | 2.376(5)  |
| Mn3-N10       | 2.384(7) | Na1-O13   | 2.645(6)  |
| Mn3-O10       | 1.892(5) |           |           |
| Angles [°]    |          |           |           |
| N1-Mn1-N4     | 110.7(3) | O3-Mn4-O4 | 75.1(4)   |
| N1-Mn1-N7     | 95.3(2)  | O3-Mn4-O7 | 91.3(2)   |

|             |          |             |            |
|-------------|----------|-------------|------------|
| O2-Mn1-N1   | 90.2(3)  | O3-Mn4-O8   | 133.9(3)   |
| O2-Mn1-N4   | 88.8(2)  | O3-Mn4-O12  | 137.0(4)   |
| O2-Mn1-N7   | 92.6(2)  | O7-Mn4-O4   | 116.7(4)   |
| O3-Mn1-N1   | 84.1(3)  | O7-Mn4-O8   | 74.5(3)    |
| O3-Mn1-N4   | 90.2(2)  | O7-Mn4-O12  | 129.2(4)   |
| O3-Mn1-N7   | 91.1(2)  | O8-Mn4-O4   | 73.3(4)    |
| O3-Mn1-O13  | 95.4(2)  | O8-Mn4-O12  | 78.4(4)    |
| O13-Mn1-N4  | 77.1(2)  | O11-Mn4-O3  | 92.8(2)    |
| O13-Mn1-N7  | 76.9(2)  | O11-Mn4-O4  | 149.1(4)   |
| O13-Mn1-O2  | 90.7(2)  | O11-Mn4-O7  | 91.4(2)    |
| N2-Mn2-N7   | 97.5(3)  | O11-Mn4-O8  | 130.2(3)   |
| N2-Mn2-N10  | 106.0(3) | O11-Mn4-O12 | 74.8(3)    |
| O6-Mn2-N2   | 91.0(3)  | O12-Mn4-O4  | 94.6(5)    |
| O6-Mn2-N7   | 87.0(2)  | O1-Na1-O13  | 126.1(2)   |
| O6-Mn2-N10  | 94.2(2)  | O2-Na1-O1   | 63.7(2)    |
| O7-Mn2-N2   | 82.0(3)  | O2-Na1-O5   | 108.7(2)   |
| O7-Mn2-N7   | 92.9(2)  | O2-Na1-O6   | 102.7(2)   |
| O7-Mn2-N10  | 88.7(2)  | O2-Na1-O9   | 140.8(2)   |
| O13-Mn2-N7  | 78.1(2)  | O2-Na1-O13  | 64.11(18)  |
| O13-Mn2-N10 | 78.3(2)  | O5-Na1-O1   | 83.8(2)    |
| O13-Mn2-O6  | 91.9(2)  | O5-Na1-O9   | 93.2(2)    |
| O13-Mn2-O7  | 95.0(2)  | O5-Na1-O13  | 125.5(2)   |
| N3-Mn3-N4   | 99.0(3)  | O6-Na1-O1   | 140.9(2)   |
| N3-Mn3-N10  | 105.7(3) | O6-Na1-O5   | 65.4(2)    |
| O10-Mn3-N3  | 91.2(2)  | O6-Na1-O9   | 116.0(2)   |
| O10-Mn3-N4  | 93.7(2)  | O6-Na1-O13  | 64.51(18)  |
| O10-Mn3-N10 | 90.0(2)  | O9-Na1-O1   | 87.8(2)    |
| O11-Mn3-N3  | 82.9(2)  | O9-Na1-O13  | 127.39(19) |
| O11-Mn3-N4  | 87.7(2)  | O10-Na1-O1  | 116.2(2)   |
| O11-Mn3-N10 | 91.2(2)  | O10-Na1-O2  | 102.5(2)   |
| O13-Mn3-N4  | 77.0(2)  | O10-Na1-O5  | 148.2(2)   |
| O13-Mn3-N10 | 78.2(2)  | O10-Na1-O6  | 102.3(2)   |
| O13-Mn3-O10 | 90.5(2)  | O10-Na1-O9  | 64.95(19)  |
| O13-Mn3-O11 | 95.5(2)  | O10-Na1-O13 | 64.05(17)  |

**Table S3. Selected Distances and Bond Angles for Cluster 2**

| Cluster       |          | 2       |          |
|---------------|----------|---------|----------|
| Distances [Å] |          |         |          |
| Mn1-N1        | 1.988(4) | Mn3-O11 | 1.900(3) |

|             |           |             |            |
|-------------|-----------|-------------|------------|
| Mn1-N4      | 2.309(5)  | Mn3-O13     | 1.882(3)   |
| Mn1-N12     | 2.316(5)  | Mn4-O3      | 2.138(3)   |
| Mn1-O2      | 1.896(3)  | Mn4-O4      | 2.271(4)   |
| Mn1-O3      | 1.898(3)  | Mn4-O7      | 2.130(4)   |
| Mn1-O13     | 1.895(3)  | Mn4-O8      | 2.263(12)  |
| Mn2-N2      | 1.979(4)  | Mn4-O11     | 2.167(4)   |
| Mn2-N4      | 2.290(4)  | Mn4-O12     | 2.202(5)   |
| Mn2-N7      | 2.334(4)  | Na1-O1      | 2.500(4)   |
| Mn2-O6      | 1.903(4)  | Na1-O2      | 2.396(4)   |
| Mn2-O7      | 1.904(4)  | Na1-O5      | 2.515(4)   |
| Mn2-O13     | 1.926(3)  | Na1-O6      | 2.356(4)   |
| Mn3-N3      | 1.970(4)  | Na1-O9      | 2.533(4)   |
| Mn3-N7      | 2.303(5)  | Na1-O10     | 2.399(4)   |
| Mn3-N10     | 2.382(5)  | Na1-O13     | 2.689(4)   |
| Mn3-O10     | 1.889(4)  |             |            |
| Angles [°]  |           |             |            |
| N1-Mn1-N4   | 90.68(18) | O3-Mn4-O8   | 141.4(4)   |
| N1-Mn1-N12  | 89.54(18) | O3-Mn4-O11  | 98.49(13)  |
| O2-Mn1-N1   | 91.07(17) | O3-Mn4-O12  | 135.92(19) |
| O2-Mn1-N4   | 92.16(16) | O7-Mn4-O3   | 91.16(14)  |
| O2-Mn1-N12  | 88.87(16) | O7-Mn4-O4   | 132.38(15) |
| O3-Mn1-N1   | 84.04(17) | O7-Mn4-O8   | 74.9(3)    |
| O3-Mn1-N4   | 89.32(16) | O7-Mn4-O11  | 87.34(14)  |
| O3-Mn1-N12  | 89.67(16) | O7-Mn4-O12  | 130.36(18) |
| O13-Mn1-N4  | 83.35(15) | O7-Mn4-O8'  | 73.1(2)    |
| O13-Mn1-N12 | 96.40(16) | O8-Mn4-O4   | 89.8(4)    |
| O13-Mn1-O2  | 90.92(15) | O11-Mn4-O4  | 138.46(15) |
| O13-Mn1-O3  | 94.08(15) | O11-Mn4-O8  | 116.2(4)   |
| N2-Mn2-N4   | 96.87(17) | O11-Mn4-O12 | 73.29(15)  |
| N2-Mn2-N7   | 99.17(17) | O12-Mn4-O4  | 84.94(17)  |
| O6-Mn2-N2   | 90.42(17) | O12-Mn4-O8  | 73.9(4)    |
| O6-Mn2-N4   | 89.51(16) | O12-Mn4-O8' | 88.3(3)    |
| O6-Mn2-N7   | 93.43(15) | O8'-Mn4-O4  | 78.2(3)    |
| O6-Mn2-O13  | 92.47(14) | O8'-Mn4-O8  | 19.3(3)    |
| O7-Mn2-N2   | 83.27(17) | O1-Na1-O5   | 85.20(14)  |
| O7-Mn2-N4   | 90.43(16) | O1-Na1-O9   | 91.21(13)  |
| O7-Mn2-N7   | 88.41(15) | O1-Na1-O13  | 122.77(14) |
| O7-Mn2-O13  | 93.85(15) | O2-Na1-O1   | 64.51(13)  |
| O13-Mn2-N4  | 83.21(15) | O2-Na1-O5   | 101.34(14) |
| O13-Mn2-N7  | 80.62(15) | O2-Na1-O9   | 151.30(14) |

|             |           |             |            |
|-------------|-----------|-------------|------------|
| N3-Mn3-N7   | 99.03(18) | O2-Na1-O10  | 114.01(15) |
| N3-Mn3-N10  | 83.78(18) | O2-Na1-O13  | 63.88(12)  |
| O10-Mn3-N3  | 92.27(17) | O5-Na1-O9   | 90.98(14)  |
| O10-Mn3-N7  | 87.09(16) | O5-Na1-O13  | 127.71(13) |
| O10-Mn3-N10 | 87.60(16) | O6-Na1-O1   | 139.10(14) |
| O11-Mn3-N3  | 83.57(17) | O6-Na1-O2   | 93.19(14)  |
| O11-Mn3-N7  | 94.63(16) | O6-Na1-O5   | 65.13(13)  |
| O11-Mn3-N10 | 90.85(16) | O6-Na1-O9   | 115.50(15) |
| O13-Mn3-Na1 | 50.01(11) | O6-Na1-O10  | 99.35(14)  |
| O13-Mn3-N7  | 82.33(15) | O6-Na1-O13  | 66.08(12)  |
| O13-Mn3-N10 | 95.16(16) | O9-Na1-O13  | 126.82(13) |
| O13-Mn3-O10 | 91.01(15) | O10-Na1-O1  | 120.68(14) |
| O13-Mn3-O11 | 93.12(15) | O10-Na1-O9  | 63.99(13)  |
| O3-Mn4-O4   | 73.10(14) | O10-Na1-O13 | 63.52(12)  |

**Table S4. Selected Distances and Bond Angles for Cluster 3**

| Cluster       |           | 3          |            |
|---------------|-----------|------------|------------|
| Distances [Å] |           |            |            |
| Mn1-N1        | 1.974(3)  | Mn3-O17    | 2.217(2)   |
| Mn1-O2        | 1.898(2)  | Mn3-O20    | 1.882(2)   |
| Mn1-O3        | 1.897(2)  | Mn4-O3     | 2.141(2)   |
| Mn1-O13       | 2.296(3)  | Mn4-O4     | 2.241(6)   |
| Mn1-O18       | 2.236(2)  | Mn4-O7     | 2.148(2)   |
| Mn1-O20       | 1.888(2)  | Mn4-O8     | 2.202(6)   |
| Mn2-N2        | 1.978(3)  | Mn4-O11    | 2.131(2)   |
| Mn2-O6        | 1.904(2)  | Mn4-O12    | 2.234(10)  |
| Mn2-O7        | 1.890(2)  | Na-O1      | 2.508(2)   |
| Mn2-O13       | 2.258(2)  | Na-O2      | 2.403(3)   |
| Mn2-O15       | 2.209(2)  | Na-O6      | 2.373(3)   |
| Mn2-O20       | 1.919(2)  | Na-O9      | 2.553(3)   |
| Mn3-N3        | 1.979(3)  | Na-O10     | 2.387(3)   |
| Mn3-O10       | 1.892(2)  | Na-O19     | 2.499(3)   |
| Mn3-O11       | 1.894(2)  | Na-O20     | 2.690(2)   |
| Mn3-O15       | 2.365(3)  |            |            |
| Angles [°]    |           |            |            |
| N1-Mn1-O13    | 95.48(11) | O3-Mn4-O4  | 72.51(15)  |
| N1-Mn1-O18    | 89.63(11) | O3-Mn4-O7  | 89.59(9)   |
| O2-Mn1-N1     | 91.58(10) | O3-Mn4-O8  | 112.5(2)   |
| O2-Mn1-O13    | 88.67(9)  | O3-Mn4-O12 | 136.5(2)   |
| O2-Mn1-O18    | 89.66(9)  | O7-Mn4-O4  | 144.92(19) |
| O3-Mn1-N1     | 83.44(10) | O7-Mn4-O8  | 74.82(16)  |
| O3-Mn1-O13    | 92.21(9)  | O7-Mn4-O12 | 132.2(2)   |

|             |            |             |            |
|-------------|------------|-------------|------------|
| O3-Mn1-O18  | 89.89(9)   | O8-Mn4-O4   | 84.4(2)    |
| O20-Mn1-O2  | 91.89(9)   | O8-Mn4-O12  | 93.0(3)    |
| O20-Mn1-O3  | 93.11(9)   | O11-Mn4-O3  | 98.19(9)   |
| O20-Mn1-O13 | 79.19(9)   | O11-Mn4-O4  | 121.8(2)   |
| O20-Mn1-O18 | 95.80(9)   | O11-Mn4-O7  | 89.85(9)   |
| N2-Mn2-O13  | 93.81(11)  | O11-Mn4-O8  | 145.2(2)   |
| N2-Mn2-O15  | 105.32(11) | O11-Mn4-O12 | 74.3(3)    |
| O6-Mn2-N2   | 91.06(11)  | O12-Mn4-O4  | 75.8(3)    |
| O6-Mn2-O13  | 92.03(9)   | O1-Na-O9    | 90.86(8)   |
| O6-Mn2-O15  | 89.29(9)   | O1-Na-O20   | 128.24(8)  |
| O6-Mn2-O20  | 91.29(9)   | O2-Na-O1    | 64.26(8)   |
| O7-Mn2-N2   | 82.99(11)  | O2-Na-O9    | 127.33(10) |
| O7-Mn2-O13  | 89.29(10)  | O2-Na-O19   | 133.60(9)  |
| O7-Mn2-O15  | 91.40(10)  | O2-Na-O20   | 64.30(7)   |
| O7-Mn2-O20  | 94.73(10)  | O6-Na-O1    | 117.68(9)  |
| O20-Mn2-O13 | 79.56(9)   | O6-Na-O2    | 98.13(9)   |
| O20-Mn2-O15 | 81.27(9)   | O6-Na-O9    | 134.13(10) |
| N3-Mn3-O15  | 91.85(10)  | O6-Na-O10   | 98.02(9)   |
| N3-Mn3-O17  | 90.10(10)  | O6-Na-O19   | 64.11(8)   |
| O10-Mn3-N3  | 91.35(10)  | O6-Na-O20   | 65.01(8)   |
| O10-Mn3-O15 | 92.37(10)  | O9-Na-O20   | 125.44(8)  |
| O10-Mn3-O17 | 88.61(10)  | O10-Na-O1   | 144.22(10) |
| O11-Mn3-N3  | 83.80(10)  | O10-Na-O2   | 110.71(9)  |
| O11-Mn3-O15 | 88.68(10)  | O10-Na-O9   | 63.31(8)   |
| O11-Mn3-O17 | 90.51(10)  | O10-Na-O19  | 113.94(9)  |
| O20-Mn3-O10 | 90.64(9)   | O10-Na-O20  | 63.49(8)   |
| O20-Mn3-O11 | 94.29(9)   | O19-Na-O1   | 85.78(8)   |
| O20-Mn3-O15 | 77.94(9)   | O19-Na-O9   | 84.87(9)   |
| O20-Mn3-O17 | 100.09(9)  | O19-Na-O20  | 127.93(9)  |

**Table S5. Selected Distances and Bond Angles for Cluster 4**

| Cluster       |          | 4       |          |
|---------------|----------|---------|----------|
| Distances [Å] |          |         |          |
| Mn1-N1        | 1.953(8) | Mn3-O16 | 2.522(6) |
| Mn1-O2        | 1.885(6) | Mn3-O13 | 1.883(5) |
| Mn1-O3        | 1.877(6) | Mn4-O11 | 2.107(6) |
| Mn1-O14       | 2.125(5) | Mn4-O12 | 2.265(7) |
| Mn1-O17       | 2.523(6) | Mn4-O3  | 2.180(6) |
| Mn1-O13       | 1.884(6) | Mn4-O4  | 2.182(7) |
| Mn2-N2        | 1.976(7) | Mn4-O7  | 2.157(6) |
| Mn2-O6        | 1.885(5) | Mn4-O8  | 2.216(6) |
| Mn2-O7        | 1.874(5) | Na1-O9  | 2.448(8) |
| Mn2-O17       | 2.285(6) | Na1-O10 | 2.402(7) |

|         |          |         |          |
|---------|----------|---------|----------|
| Mn2-O16 | 2.328(6) | Na1-O1  | 2.532(7) |
| Mn2-O13 | 1.899(5) | Na1-O2  | 2.377(8) |
| Mn3-N3  | 1.970(7) | Na1-O5  | 2.539(8) |
| Mn3-O10 | 1.882(6) | Na1-O6  | 2.361(7) |
| Mn3-O11 | 1.892(5) | Na1-O13 | 2.658(6) |
| Mn3-O15 | 2.097(6) |         |          |

Angles [°]

|             |          |             |           |
|-------------|----------|-------------|-----------|
| N1-Mn1-O14  | 88.9(3)  | O11-Mn4-O12 | 73.1(3)   |
| N1-Mn1-O17  | 93.5(3)  | O11-Mn4-O3  | 95.3(2)   |
| O2-Mn1-N1   | 92.1(3)  | O11-Mn4-O4  | 124.7(3)  |
| O2-Mn1-O14  | 91.8(2)  | O11-Mn4-O7  | 89.2(2)   |
| O2-Mn1-O17  | 82.1(2)  | O11-Mn4-O8  | 139.3(3)  |
| O3-Mn1-N1   | 82.5(3)  | O3-Mn4-O12  | 142.3(3)  |
| O3-Mn1-O14  | 94.2(2)  | O3-Mn4-O4   | 73.6(2)   |
| O3-Mn1-O17  | 92.0(2)  | O3-Mn4-O8   | 121.2(3)  |
| O3-Mn1-O13  | 92.3(2)  | O4-Mn4-O12  | 83.8(3)   |
| O13-Mn1-O2  | 91.9(3)  | O4-Mn4-O8   | 85.6(3)   |
| O13-Mn1-O14 | 101.8(2) | O7-Mn4-O12  | 124.1(3)  |
| O13-Mn1-O17 | 76.3(2)  | O7-Mn4-O3   | 90.6(2)   |
| N2-Mn2-O17  | 95.1(3)  | O7-Mn4-O4   | 143.0(3)  |
| N2-Mn2-O16  | 99.9(3)  | O7-Mn4-O8   | 74.2(2)   |
| O6-Mn2-N2   | 90.8(3)  | O8-Mn4-O12  | 85.7(3)   |
| O6-Mn2-O17  | 96.0(2)  | O9-Na1-O1   | 98.9(3)   |
| O6-Mn2-O16  | 88.2(2)  | O9-Na1-O5   | 86.3(3)   |
| O6-Mn2-O13  | 91.9(2)  | O9-Na1-O13  | 123.4(2)  |
| O7-Mn2-N2   | 82.9(3)  | O10-Na1-O9  | 64.5(2)   |
| O7-Mn2-O17  | 86.2(2)  | O10-Na1-O5  | 105.4(3)  |
| O7-Mn2-O16  | 91.4(2)  | O10-Na1-O13 | 62.43(19) |
| O7-Mn2-O13  | 94.3(2)  | O1-Na1-O5   | 87.3(3)   |
| O13-Mn2-O17 | 82.3(2)  | O1-Na1-O13  | 124.6(3)  |
| O13-Mn2-O16 | 82.5(2)  | O2-Na1-O9   | 119.9(3)  |
| N3-Mn3-O15  | 87.6(3)  | O2-Na1-O10  | 110.4(2)  |
| N3-Mn3-O16  | 94.4(3)  | O2-Na1-O1   | 63.4(2)   |
| O10-Mn3-N3  | 91.5(3)  | O2-Na1-O5   | 142.1(3)  |
| O10-Mn3-O15 | 94.4(3)  | O2-Na1-O13  | 64.8(2)   |
| O10-Mn3-O16 | 91.7(2)  | O5-Na1-O13  | 125.5(2)  |
| O10-Mn3-O13 | 88.7(2)  | O6-Na1-O9   | 141.2(3)  |
| O11-Mn3-N3  | 83.5(3)  | O6-Na1-O10  | 97.8(2)   |
| O11-Mn3-O15 | 91.1(3)  | O6-Na1-O1   | 104.2(2)  |
| O11-Mn3-O16 | 83.0(2)  | O6-Na1-O2   | 98.3(3)   |
| O13-Mn3-O11 | 95.4(2)  | O6-Na1-O5   | 64.4(2)   |
| O13-Mn3-O15 | 100.3(2) | O6-Na1-O13  | 65.35(19) |
| O13-Mn3-O16 | 77.7(2)  |             |           |

---
